# Supplementary material for: 68Gallium-FAPI-positron emission tomography for dignity assessment of mass-forming chronic pancreatitis and pancreatic ductal adenocarcinomas compared to laboratory parameters, ultrasound and computed tomography
Source: Research Square preprint supplement (doi:10.21203/rs.3.rs-5640954/v1), 2024-12-24
Supplement: Supplementary file 1 [file f5777576a214f25fd0ffa0f5.docx]

**68Gallium-FAPI-positron emission tomography for dignity assessment of mass-forming chronic pancreatitis and pancreatic ductal adenocarcinomas compared to laboratory parameters, ultrasound and computed tomography**

**Running title:** 68Gallium-FAPI-PET for MFCP and PDAC

Matthias Lang1,2, Markus Preussig3,9, Anna-Maria Spektor4, Isabelle von Goetze4, Joel Wessendorf4, Frederik M. Glatting3,5,6, Ewgenija Gutjahr7, Thomas M. Pausch1, Ulrike Heger1, Isabelle Mohr8, Philipp Mayer9,10, Hans-Georg Buchholz4, Mathias Schreckenberger4, Hans-Ulrich Kauczor9,10, Christin Tjaden11, Thilo Hackert12, Christoph Michalski1, Uwe Haberkorn3,10,13 and Manuel Röhrich10

**Affiliations:**

1. Department of General, Visceral and Transplantation Surgery, Heidelberg University Hospital, Heidelberg, Germany
2. Endokrinologikum Wiesbaden, Germany
3. Department of Nuclear Medicine, University Hospital Heidelberg, Germany
4. Department of Nuclear Medicine, University Hospital Mainz, Germany
5. Clinical Cooperation Unit Molecular and Radiation Oncology, German Cancer Research Center, Heidelberg, Germany
6. Department of Radiation Oncology, University Hospital Heidelberg, Germany
7. Institute of Pathology, University Hospital Heidelberg, Germany
8. Department of Gastroenterology, University Hospital Heidelberg, Germany
9. Department of Diagnostic and Interventional Radiology, University Hospital Heidelberg
10. German Center of Lung Research (DZL), Heidelberg, Germany
11. Department of Surgery, University Hospital Munich, Klinikum rechts der Isar (TU), Munich, Germany
12. Department of General, Visceral and Thoracic Surgery, University Hospital Hamburg, Hamburg, Germany
13. Clinical Cooperation Unit Nuclear Medicine, German Cancer Research Center (DKFZ), Heidelberg, Germany

**Corresponding Author:**

Manuel Röhrich

Langenbeckstr. 1

55131 Mainz

Telefon +49 (0) 6131 17-6516

Telefax +49 (0) 6131 17-2386

E-Mail: [manuel.roehrich@unimedizin-mainz.de](mailto:manuel.roehrich@unimedizin-mainz.de)

ORCID-ID: 0000-0001-7609-243X

**Supplemental table 1:** Laboratory parameters, ultrasound and CT-findings of 26 patients with suspicious pancreatic masses

| **No** | **Classi-fication** | **Laboratory**  **parameters** | | | **Ultrasound** | | | | | **CT** |
| --- | --- | --- | --- | --- | --- | --- | --- | --- | --- | --- |
| CA 19-9 | CEA | CRP | CEUS | Arterial  phase | Late phase | Size (mm) | Findings | Size (mm) |
| **1** | PDAC | 11.6 | 2.9 | 8 | Yes | 2 | 2 | 70 | 3,6,9,10 | 76 |
| **2** | 8.6 | 1.6 | 0 | Yes | 2 | 2 | 13 | 1,3,5 | ND |
| **3** | 35 | 0.3 | 53.7 | Yes | 2 | 1 | 29 | 1,9,10 | 35 |
| **4** | 27.7 | 0.5 | 0 | Yes | 1 | 0 | 6 | 1,3,5 | 6 |
| **5** | 2831 | 5.4 | 64.1 | ND | ND | ND | ND | ND | 59 |
| **6** | 32 | 2.2 | 0 | Yes | 1 | 1 | 49 | 1,5,8 | 42 |
| **7** | 121 | 6.3 | 0 | Yes | 1 | 1 | 35 | 1,3,5 | 13 |
| **8** | 1.6 | 0.8 | 2.6 | Yes | 2 | 1 | 10 | 1,8,10 | ND |
| **9** | 12.7 | 1.4 | 0 | Yes | 2 | 1 | 25 | 1,5 | 24 |
| **10** | 46.7 | 1.5 | 4.3 | ND | ND | ND | ND | ND | ND |
| **11** | 60 | 4.5 | 20.9 | Yes | 3 | 1 | 45 | 1,5,7 | ND |
| **12** | 0 | 1.2 | 3.4 | Yes | 1 | 1 | 10 | 1,3 | 14 |
| **13** | 251 | 0.5 | 14.6 | Yes | 0 | 2 | 41 | 1,3,6,9,10 | 42 |
| **14** | 31.8 | 0.8 | 0 | Yes | 1 | 1 | 40 | 1,2,3,5 | 50 |
| **15** | MFCP | 57.7 | 1.2 | 0 | No | ND | ND | 37 | none | 27 |
| **16** | 1.9 | 8.9 | 6.4 | No | ND | ND | NM | 3,7,8,9 | 18 |
| **17** | 9.6 | 3.8 | 0 | Yes | 2 | 2 | ND | 6,7,8,9,10 | 21 |
| **18** | 31.2 | 1.8 | 3 | No | ND | ND | ND | ND | ND |
| **19** | 47.8 | 5.8 | 0 | No | ND | ND | ND | ND | ND |
| **20** | 11.6 | 1.8 | 12.3 | Yes | 2 | 1 | 41 | 3,6,7,8,9,10 | 48 |
| **21** | 31.2 | 3.3 | 3 | Yes | 2 | 2 | 13 | 1,6,10 | 14 |
| **22** | 13.7 | 2.6 | 3.5 | Yes | 1 | 1 | NM | 5 | ND |
| **23** | 24.7 | ND | ND | No | ND | ND | 54 | 7,8,9 | 41 |
| **24** | 26.2 | 0.8 | 110 | Yes | 2 | 1 | 51 | 1,3,6,10 | 59 |
| **25** | 0 | 0.3 | 5.3 | Yes | 2 | 2 | 78 | 9 | 30 |
| **26** | 51.8 | 11.1 | 10 | No | ND | ND | 34 | 1,3,8 | 35 |
| **Abbreviations:** PDAC = pancreatic ductal adenocarcinoma, MFCP = mass forming chronic pancreatitis, ND = no data availabe, NM = not measurable, CEUS = contrast enhanced ultrasound  For arterial/late phase: 0 = no enhancement, 1 = hypoenhancement, 2 = isoenhancement, 3 = hyperenhancement  For Findings: 1 = hypoechoic mass, 2 = encasement of adjacent vessels, 3 = duct related signs: double duct sign, abrupt interruption of duct, 4 = displaced calcification, 5 = hypocontrasting mass in CEUS, 6 = calcification, 7 = intraductal calcification, 8 = duct related signs: caliber fluctuation, dilatation with funnel-shaped narrowing, dilatation of the branch duct, 9 = pancreatic cysts, 10 = iso- or hyperenhancement in CEUS | | | | | | | | | | |
